# Supplementary material for: Exploring constructs of well-being, happiness and quality of life
Source: PeerJ. 2018 Jun 1;6:e4903. doi: 10.7717/peerj.4903 (PMC5985772; doi:10.7717/peerj.4903)
Supplement: Supplemental Information 1 [file peerj-06-4903-s001.xlsx]

## Sheet: Sheet1
CASES	OXH1	OXH1R	OXH2	OXH3	OXH4	OXH5	OXH5R	OXH6	OXH6R	OXH7	OXH8	OXH9	OXH10	OXH10R	OXH11	OXH12	OXH13	OXH13R	OXH14	OXH14R	OXH15	OXH16	OXH17	OXH18	OXH19	OXH19R	OXH20	OXH21	OXH22	OXH23	OXH23R	OXH24	OXH24R	OXH25	OXH26	OXH27	OXH27R	OXH28	OXH28R	OXH29	OXH29R	QL1	QL2	QL3	QL3R	QL4	QL4R	QL5	QL6
1	4	3	4	4	3	5	2	4	3	4	4	4	4	3	4	3	5	2	5	2	4	5	5	3	2	5	4	5	4	2	5	4	3	2	4	2	5	4	3	5	2	4	2	4	2	3	3	4	3
2	1	6	6	5	5	1	6	1	6	5	1	6	5	2	5	4	1	6	3	4	5	5	4	2	4	3	4	5	5	5	2	4	3	4	4	2	5	2	5	3	4	5	5	2	4	1	5	5	2
3	5	2	5	5	5	4	3	2	5	4	5	5	2	5	5	4	2	5	2	5	5	5	4	5	2	5	4	5	5	2	5	1	6	2	2	2	5	2	5	1	6	4	4	1	5	1	5	4	5
4	4	3	5	5	5	3	4	2	5	4	4	5	3	4	3	4	3	4	4	3	3	5	4	3	4	3	2	4	4	4	3	1	6	2	2	4	3	3	4	2	5	4	3	4	2	3	3	3	5
5	3	4	3	4	3	5	2	5	2	3	3	4	5	2	4	3	6	1	6	1	3	4	5	3	4	3	3	4	5	2	5	2	5	3	4	4	3	5	2	2	5	3	3	3	3	2	4	3	3
6	1	6	6	6	5	4	3	1	6	6	5	6	1	6	6	5	1	6	6	1	6	6	5	4	2	5	5	3	6	3	4	1	6	5	4	1	6	5	2	1	6	5	3	1	5	1	5	5	5
7	4	3	5	4	5	4	3	4	3	5	5	4	3	4	6	5	4	3	4	3	4	6	6	4	5	2	3	3	4	5	2	3	4	3	5	3	4	3	4	2	5	4	4	3	3	3	3	4	4
8	2	5	3	6	4	2	5	1	6	2	5	5	2	5	3	4	5	2	3	4	4	4	3	2	4	3	3	3	4	4	3	2	5	3	5	2	5	2	5	1	6	4	4	2	4	1	5	4	4
9	5	2	6	3	5	1	6	3	4	5	6	3	4	3	5	3	1	6	5	2	3	4	4	3	4	3	3	6	4	3	4	6	1	5	3	4	3	2	5	5	2	4	5	1	5	1	5	3	1
10	2	5	4	4	4	4	3	3	4	4	4	4	3	4	6	4	2	5	4	3	4	4	4	3	2	5	4	4	5	4	3	3	4	5	4	2	5	4	3	1	6	3	3	2	4	1	5	3	3
11	4	3	3	3	3	4	3	2	5	4	5	4	4	3	3	4	2	5	5	2	3	6	5	5	2	5	3	5	4	2	5	1	6	3	5	2	5	2	5	1	6	3	4	1	5	1	5	3	4
12	3	4	4	5	5	5	2	3	4	4	3	4	1	6	6	4	4	3	3	4	4	5	4	3	3	4	4	3	5	4	3	2	5	4	5	1	6	3	4	6	1	4	3	2	4	2	4	4	4
13	3	4	4	5	4	2	5	2	5	4	4	3	3	4	2	2	2	5	4	3	4	4	3	3	5	2	3	3	3	4	3	2	5	4	3	3	4	2	5	3	4	4	4	3	3	4	2	3	4
14	3	4	3	5	4	4	3	2	5	3	4	5	3	4	3	5	3	4	4	3	5	5	3	2	2	5	4	2	4	4	3	3	4	4	4	2	5	2	5	1	6
15	2	5	6	5	5	3	4	1	6	4	3	6	1	6	6	3	1	6	5	2	4	5	6	6	2	5	4	3	4	3	4	2	5	4	5	1	6	4	3	2	5	4	2	1	5	1	5	4	3
16	2	5	5	6	6	2	5	2	5	6	3	6	2	5	6	4	2	5	5	2	6	6	6	5	5	2	5	5	5	3	4	3	4	5	6	1	6	2	5	1	6	4	4	1	5	1	5	4	3
17	2	5	4	5	4	4	3	2	5	4	4	5	2	5	5	5	4	3	3	4	5	4	5	4	4	3	4	5	5	2	5	2	5	4	5	1	6	1	6	1	6	4	4	3	3	2	4	4	4
18	5	2	4	2	3	6	1	6	1	2	3	3	4	3	4	2	6	1		3	2	5	3	2	5	2	3	4	5	6	1	6	1	2	2	2	5	5	2	3	4	3	2	4	2	3	3	2	2
19	1	6	6	6	4		5	2	5	4	3	5	2	5	5	4	1	6	1	6	5	6	6	2	2	5	5	5	6	2	5	1	6	5	6	1	6	1	6	1	6	4	4			1	5		4
20	1	6	3	5	4	3	4	6	1	5	4	6	1	6	6	4	3	4	5	2	6	6	5	3	3	4	3	4	3	1	6	4	3	3	3	3	4	2	5	2	5	4	4	3	3	2	4	5	4
21	4	3	4	5	5	2	5	1	6	3	3	5	1	6	3	4	5	2	5	2	4	6	5	2	1	6	5	4	4	2	5	1	6	4	4	2	5	4	3	4	3	4	4	2	4	1	5	4	4
22	1	6	5	5	5	1	6	1	6	4	4	6	1	6	6	4	1	6	5	2	6	6	5	5	1	6	5	6	6	1	6	1	6	6	6	1	6	1	6	1	6	5	5	1	5	1	5	5	5
23	2	5	5	6	5	4	3	1	6	2	4	5	4	3	4	4	4	3	4	3	4	4	4	3	1	6	5	4	5	4	3	1	6	4	4	2	5	4	3	4	3	4	4	4	2	1	5	4	5
24	2	5	4	5	5	4	3	3	4	4	1	5	1	6	5	4	3	4	3	4	5	5	4	4	2	5	5	4	5	5	2	2	5	5	4	1	6	1	6	2	5	5	4	2	4	1	5	4	4
25	3	4	3	6	2	4	3	1	6	1	3	4	5	2	1	1	2	5	6	1	2	6	1	1	2	5	3	4	2	2	5	1	6	2	4	3	4	4	3	5	2	4	4	4	2	1	5	3	4
26	1	6	1	6	6	1	6	1	6	3	6	6	1	6	6	6	1	6	1	6	6	6	6	6	1	6	4	6	6	5	2	1	6	6	6	1	6	1	6	3	4	5	5	2	4	1	5	5	5
27	3	4	4	3	3	3	4	3	4	2	3	3	3	4	2	3	4	3	3	4	2	4	3	3	3	4	4	3	3	3	4	4	3	4	3	4	3	4	3	4	3	3	2	3	3	3	3	3	3
28	3	4	3	4	3	5	2	1	6	4	4	4	4	3	5	4	3	4	4	3	4	5	4	3	3	4	5	4	5	4	3	4	3	3	4	2	5	3	4	3	4	4	3	1	5	1	5	3	3
29	5	2	4	6	5	4	3	1	6	4	5	5	2	5	4	5	3	4	2	5	5	5	4	4	1	6	5	5	5	3	4	1	6	5	5	2	5	4	3	4	3	4	4	3	3	2	4	5	4
30	2	5	3	5	5	3	4	3	4	3	4	6	2	5	4	3	4	3	4	3	3	5	4	4	4	3	4	4	5	3	4	1	6	3	3	2	5	3	4	2	5	4	3	3	3	2	4	4	5
31	4	3	5	1	4	1	6	1	6	3	4	5	6	1	6	6	3	4	4	3	6	5	4	6	4	3	5	5	5	1	6	1	6	5	5	1	6	1	6	3	4	4	4	3	3	4	2	5	3
32	1	6	4	5	6	2	5	1	6	5	5	5	4	3	5	5	5	2	3	4	5	6	4	5	1	6	5	6	6	4	3	1	6	5	6	1	6	2	5	1	6	5	4	1	5	1	5	5	5
33	2	5	5	6	3	4	3	1	6	3	4	5	4	3	4	4	3	4	4	3	5	5	3	4	2	5	5	5	5	2	5	1	6	5	4	1	6	2	5	2	5	5	4	1	5	2	4	4	5
34	3	4	5	5	3	5	2	3	4	4	4	5	3	4	6	3	2	5	3	4	4	4	3	4	4	3	3	4	5	5	2	3	4	4	4	2	5	3	4	2	5		2	2	4	1	5	4	4
35	2	5	6	6	4	2	5	1	6	1	3	5	2	5	5	4	2	5	5	2	5	6	3	4	2	5	5	6	6	5	2	2	5	5	5	1	6	1	6	1	6	5	5	1	5	1	5	4	5
36		5	5	6	4	2	5	1	6	6	6	6	2	5	6	5	2	5	3	4	6	6	6	4	4	3	6	6	6	2	5	2	5	6	6	1	6	2	5	1	6	5	5	1	5	1	5	5	5
37	2	5	5	5	4	5	2	2	5	4	5	5	2	5	4	5	3	4	3	4	4	5	4	2	1	6	2	4	4	6	1	1	6	3	5	1	6	1	6	4	3	5	4	3	3	3	3	4	4
38	2	5	6	5	4	2	5	2	5	2	5	4	2	5	3	5	4	3	5	2	3	5	3	3	5	2	3	5	6	4	3	2	5	3	4	2	5	2	5	1	6	2	4	2	4	2	4	4	4
39	3	4	5	5	2	5	2	2	5	4	2	5	2	5	4	2	4	3	4	3	4	5	3	4	5	2	5	5	5	5	2	2	5	1	4	3	4	5	2	1	6	4	2	2	4	4	2	4	4
40	4	3	5	5	4	2	5	5	2	5	4	5	1	6	6	4	6	1	4	3	5	5	4	2	6	1	3	4	5	5	2	3	4	4	3	1	6	3	4	3	4	3	4	4	2	4	2	5	4
41	2	5	6	6	4	4	3	1	6	6	5	5	2	5	6	6	2	5	5	2	5	6	5	3	4	3	6	6	6	2	5	1	6	5	5	1	6	3	4	1	6	5	4	2	4	2	4	4	5
42	2	5	5	4	3	3	4	2	5	5	4	4	2	5	4	4	2	5	6	1	4	4	5	5	1	6	5	5	5	6	1	3	4	4	4	1	6	1	6	1	6	4	4	1	5	1	5	4	4
43	2	5	5	4	2	6	1	4	3	4	3	3	2	5	5	3	4	3	6	1	3	4	4	2	3	4	2	3	3	5	2	4	3	2	3	3	4	4	3	3	4	4	2	1	5	4	2	3	3
44	1	6	5	5	5	3	4	1	6	4	5	6	5	2	5	5	3	4	4	3	5	4	4	2	4	3	5	5	5	2	5	3	4	5	5	2	5	2	5	1	6	5	5	1	5	1	5	5	4
45	2	5	4	5	5	2	5	2	5	4	6	6	1	6	5	6	4	3	6	1	6	6	5	5	4	3	5	6	6	6	1	1	6	5	5	1	6	1	6	1	6	5	4	3	3	2	4	5	5
46	2	5	5	5	3	3	4	1	6	4	2	6	5	2	6	4	1	6	5	2	5	6	4	4	4	3	5	4	6	3	4	2	5	4	4	2	5	2	5	6	1	4	3	2	4	1	5	5	5
47	5	2	5	4	2	5	2	3	4	5	4	3	5	2	5	2	5	2	6	1	2	5	5	2	5	2	4	2	3	6	1	2	5	3	5	1	6	4	3	1	6	2	2	2	4	1	5	2	2
48	4	3	5	5	3	6	1	5	2	2	2	4	5	2	2	2	4	3	6	1	2	6	2	2	4	3	1	3	2	6	1	6	1	1	1	5	2	3	4	6	1	4	4	2	4	3	3	3	3
49	1	6	3	4	5	2	5	1	6	5	4	6	1	6	6	5	2	5	2	5	5	6	5	3	5	2	4	2	6	6	1	1	6	5	4	1	6	2	5	1	6	4	4	1	5	1	5	4	4
50	2	5	6	6	6	4	3	2	5	6	5	6	2	5	6	5	2	5	4	3	6	6	5	5	2	5	5	6	6	2	5	2	5	4	5	1	6	3	4	2	5	5	4	2	4	2	4	5	4
51	3	4	3	4	5	5	2	5	2	4	4	3	4	3	4	4	2	5	5	2	4	3	5	4	5	2	4	4	4	6	1	3	4	4	4	2	5	4	3	5	2	3	3	3	3	1	5	3	3
52	2	5	6	6	6	6	1	1	6	5	5	6	2	5	6	3	5	2	4	3	3	6	5	2	4	3	5	3	4	5	2	2	5	4	5	2	5	2	5	2	5	5	3	1	5	1	5	4	4
53	2	5	6	5	4	3	4	2	5	5	5	4	2	5	5	4	3	4	3	4	4	4	5	4	2	5	5	5	5	4	3	2	5	4	5	1	6	2	5	3	4	4	4	1	5	1	5	4	4
54	1	6	5	5	4	2	5	2	5	4	5	6	3	4	5	5	2	5	5	2	5	5	4	4	2	5	4	5	4	4	3	2	5	5	5	1	6	1	6	1	6	5	5	1	5	1	5	4	4
55	4	3	3	2	2	5	2	4	3	2	2	3	4	3	3	2	6	1	3	4	2	3	3	2	4	3	2	2	3	2	5	4	3	2	3	3	4	5	2	2	5	2	2	2	4	1	5	3	2
56	5	2	6	6	5	3	4	3	4	4	5	5	2	5	5	4	3	4	4	3	4	5	4	2	4	3	3	5	4	4	3	1	6	5	4	1	6	2	5	2	5	4	4	3	3	1	5	4	5
57	5	2	4	4	3	4	3	3	4	3	4	3	4	3	4	3	5	2	5	2	4	5	4	3	4	3	3	3	4	3	4	4	3	3	4	4	3	3	4	4	3	4	4	3	3	4	2	3	4
58	5	2	4	5	4	2	5	5	2	5	5	4	2	5	4	4	3	4	3	4	4	6	5	5	3	4	5	5	5	2	5	5	2	5	5	2	5	4	3	5	2	3	3	2	4	2	4	4	4
59	1	6	4	3	4	3	4	4	3	3	3	4	2	5	5	4	2	5	3	4	4	4	4	4	3	4	3	3	4	4	3	3	4	4	4	4	3	3	4	3	4	4	4	4	2	2	4	4	4
60	1	6	5	5	5	6	1	1	6	2	5	6	1	6	5	5	5	2	6	1	6	5	6	6	5	2	6	5	6	6	1	1	6	5	6	1	6	1	6	1	6		1	2	4	3	3	5	4
61	2	5	5	6	6	3	4	4	3	3	5	5	1	6	4	3	3	4	4	3	4	4	5	4	3	4	2	3	2	5	2	2	5	5	6	4	3	1	6	2	5	4	4	3	3	1	5	4	5
62	2	5	4	5	5	3	4	5	2	5	4	5	2	5	6	4	3	4	4	3	5	5	5	4	4	3	4	4	5	3	4	1	6	4	4	1	6	4	3	2	5	4	3	3	3	2	4	4	5
63	1	6	5	5	3	1	6	1	6	4	6	6	1	6	4	5	1	6	2	5	5	5	4	4	1	6	6	5	4	6	1	1	6	5	5	3	4	1	6	4	3	5	5	1	5	1	5	4	4
64	4	3	5	3	3	5	2	4	3	6	4	4	4	3	6	3	4	3	6	1	3	3	5	5	4	3	4	4	4	3	4	4	3	3	4	2	5	3	4	3	4	3	2	2	4	4	2	3	3
65	5	2	6	4	4	3	4	3	4	3	4	4	3	4	4	2	2	5	4	3	3	5	4	3	3	4	3	3	3	4	3	3	4	4	4	2	5	3	4	5	2	4	2	2	4	2	4	3	3
66	2	5	5	5	2	4	3	4	3	3	3	5	3	4	3	3	3	4	5	2	5	4	3	4	3	4	4	5	5	2	5	4	3	2	4	2	5	4	3	2	5	2	3	3	3	1	5	4	3
67	2	5	5	5	5	4	3	1	6	4	5	5	3	4	4	5	3	4	5	2	5	5	3	4	2	5	5	5	4	4	3	1	6	4	4	3	4	2	5	1	6	5	4	1	5	1	5	5	5
68	2	5	4	5	5	3	4	1	6	6	5	6	2	5	6	5	1	6	2	5	6	6	6	5	3	4	5	5	6	4	3	2	5	5	5	1	6	2	5	2	5	5	5	1	5	1	5	5	5
69	5	2	5	2	4	6	1	6	1	3	5	3	3	4	4	2	2	5	5	2	2	4	3	3	6	1	3	2	2	3	4	5	2	1	1	4	3	6	1	6	1	3	2	1	5	1	5	1	1
70	4	3	5	3	4	5	2	2	5	3	5	4	4	3	3	2	2	5	3	4	4	6	3	2	3	4	2	4	4	4	3	2	5	3	3	3	4	4	3	2	5	4	3	1	5	1	5	3	4
71	2	5	5	6	6	4	3	2	5	4	5	5	2	5	5	4	2	5	4	3	5	5	5	6	2	5	5	5	5	2	5	2	5	5	4	2	5	2	5	3	4	5	5	4	2	1	5	5	5
72	1	6	5	6	4	1	6	1	6	5	4	6	1	6	6	5	1	6	1	6	5	5	4	5	1	6	4	5	6	3	4	1	6	5	4	1	6	1	6	2	5	5	4	3	3	2	4	4	4
73	3	4	3	4	4	5	2	3	4	3	3	3	5	2	3	4	2	5	4	3	3	5	4	4	2	5	5	3	2	1	6	4	3	3	4	2	5	2	5	5	2	3	4	2	4	1	5	3	2
74	1	6	1	4	2	3	4	2	5	4	4	5	1	6	4	4	2	5	5	2	5	6	4	4	5	2	4	5	4	6	1	1	6	6	4	1	6	1	6	4	3	3	4	2	4	1	5	4	5
75	2	5	3	5	4	5	2	3	4	4	5	5	2	5	4	4	4	3	4	3	4	4	3	3	3	4	4	4	5	4	3	3	4	3	3	2	5	2	5	2	5	3	3	3	3	3	3	3	3
76	5	2	6	5	4	3	4	1	6	6	3	3	3	4	6	5	2	5	5	2	6	6	6	5	5	2	4	2	6	6	1	6	1	6	6	1	6	5	2	1	6	5	4	1	5	1	5	5	5
77	2	5	6	4	2	1	6	2	5	5	3	5	5	2	6	3	2	5	4	3	5	5	5	3	2	5	4	3	5	5	2	2	5	3	6	1	6	4	3	5	2	5	2	2	4	4	2	4	4
78	1	6	4	1	4	4	3	1	6	1	2	6	1	6	6	6	1	6	4	3	6	2	5	3	1	6	6	6	6	5	2	1	6	6	5	1	6	1	6	1	6	5	4	2	4	1	5	5	5
79	2	5	5	5	3	4	3	1	6	4	4	5	4	3	5	5	3	4	3	4	5	5	5	5	1	6	5	4	4	2	5	2	5	4	5		5	2	5	2	5	4	5	1	5	1	5	4	4
80	5	2	3	4	2	1	6	1	6	5	4	5	3	4	6	5	2	5	4	3	5	6	3	4	1	6	5	6	6	5	2	1	6	4	5	1	6	1	6	3	4	5	4	1	5	1	5	4	3
81	5	2	2	4	4	2	5	3	4	5	5	6	2	5	6	4	3	4	3	4	5	3	3	4	2	5	5	5	5	3	4	1	6	5	5	2	5	5	2	1	6	5	4	2	4	1	5	5	5
82	5	2	4	5	5	2	5	2	5	5	5	6	3	4	5	5	3	4	5	2	5	5	4	3	2	5	5	4	6	6	1	1	6	5	5	2	5	2	5	3	4	4	3	2	4	1	5	4	4
83	5	2	4	4	3	2	5	4	3	4	3	4	6	1	5	3	2	5	4	3	3	4	3	2	3	4	2	3	3	4	3	4	3	3	4	3	4	2	5	3	4	4	4	1	5	1	5	3	3
84	3	4	4	4	6	5	2	3	4	4	5	5	4	3	6	4	4	3	5	2	4	5	6	5	4	3	4	4	5	4	3	4	3	5	6	2	5	4	3	2	5		2	3	3	2	4	4	3
85	2	5	5	4	5	3	4	1	6	5	3	4	3	4	6	5	3	4	1	6	5	4	5	4	2	5	5	4	5	4	3	1	6	4	4	1	6	3	4	3	4	4	3	3	3	2	4	4	5
86	5	2	2	4	3	6	1	2	5	3	4	5	3	4	4	3	6	1	6	1	3	4	5	3	3	4	5	3	5	3	4	3	4	4	3	2	5	4	3	4	3		3			2	4		3
87	6	1	3	6	5	1	6	1	6	5	5	6	1	6	6	5	2	5	1	6	6	6	5	5	1	6	4	6	5	1	6	1	6	5	5	1	6	1	6	1	6	5	5	1	5	1	5	5	5
88	2	5	4	5	5	2	5	1	6	5	4	5	3	4	5	4	3	4	4	3	5	6	4	5	3	4	5	4	4	2	5	1	6	5	5	1	6	3	4	4	3	5	4	1	5	1	5	4	4
89	5	2	3	3	5	5	2	4	3	3	4	3	3	4	3	2	6	1	3	4	2	5	3	2	2	5	2	3	3	5	2	5	2	4	4	2	5	2	5	5	2	2	3	2	4	2	4	2	3
90	2	5	5	4	4	4	3	2	5	4	3	4	2	5	4	4	3	4	4	3	4	4	3	1	1	6	4	4	4	4	3	2	5	3	3	1	6	2	5	1	6	4	4	1	5	1	5	4	4
91	4	3	4	5	5	3	4	3	4	5	5	4	3	4	5	4	4	3	5	2	3	4	4	4	4	3	4	4	4	4	3	4	3	3	4	3	4	5	2	4	3	3	3	2	4	1	5	4	4
92	2	5	4	4	3	3	4	2	5	5	4	4	2	5	4	4	3	4	3	4	4	4	3	3	3	4	4	4	4	5	2	2	5	3	4	1	6	2	5	2	5	4	4	2	4	1	5	4	4
93	3	4	3	4	4	5	2	2	5	4	3	4	3	4	4	5	5	2	4	3	3	3	3	3	4	3	2	4	3	2	5	2	5	4	4	3	4	4	3	1	6
94	1	6	4	3	4	2	5	1	6	4	4	6	1	6	6	5	2	5	2	5	5	6	4	3	1	6	3	6	6	3	4	2	5	5	6	1	6	1	6	2	5	5	5	2	4	1	5	4	4
95	3	4	5	3	3	3	4	4	3	5	4	3	3	4	4	2	3	4	4	3	3	3	5	4	4	3	3	2	3	4	3	4	3	4	3	1	6	3	4	5	2	3	2	4	2	4	2	3	3
96	2	5	5	6	3	4	3	5	2	5	3	6	4	3	4	5	1	6	3	4	6	3	3	4	2	5	5	4	5	4	3	2	5	3	5	2	5	5	2	2	5	4	4	2	4	1	5	4	5
97	3	4	4	3	4	5	2	2	5	3	4	4	1	6	5	3	4	3	4	3	4	4	4	3	3	4	3	4	3	2	5	4	3	3	4	1	6	2	5	1	6	4	4	3	3	2	4	4	4
98	2	5	4	6	5	4	3	2	5	4	4	5	1	6	6	5	2	5	4	3	5	5	4	4	2	5	5	5	5	4	3	2	5	3	4	1	6	2	5	1	6	5	4	1	5	2	4	5	4
99	4	3	2	3	4	5	2	2	5	5	3	5	4	3	4	2	4	3	5	2	4	5	4	2	2	5	3	3	4	5	2	4	3	2	3	2	5	5	2	5	2	4	2	3	3	1	5	3	2
100	1	6	4	4	5	4	3	5	2	4	4	5	2	5	2	4	2	5	4	3	4	5	4	4	4	3	5	3	5	3	4	2	5	5	4	2	5	1	6	3	4	4	5	1	5	1	5	4	4
101	3	4	3	3	2	3	4	2	5	3	3	3	1	6	5	3	4	3	4	3	4	4	3	2	3	4	2	2	3	5	2	2	5	2	2	2	5	5	2	2	5	2	1	3	3	1	5	3	3
102	2	5	4	4	4	3	4	5	2	3	6	5	2	5	6	5	2	5	4	3	6	4	5	5	4	3	6	5	5	4	3	2	5	3	5	1	6	1	6	1	6	3	4	2	4	1	5	4	4
103	2	5	5	4	6	4	3	1	6	6	4	4	2	5	6	4	3	4	4	3	5	5	6	5	4	3	4	5	5	5	2	2	5	6	5	1	6	2	5	2	5	3	2	2	4	4	2	4	4
104	2	5	3	6	4	4	3	1	6	4	4	6	1	6	6	6	1	6	4	3	5	6	5	5	3	4	5	5	6	2	5	1	6	4	5	1	6	1	6	2	5	4	4	2	4	1	5	5	5
105	3	4	4	3	3	2	5	3	4	3	3	4	1	6	2	3	5	2	5	2	3	3	3	4	5	2	3	3	3	5	2	2	5	2	3	4	3	3	4	2	5	3	3	2	4	3	3	3	3
106	1	6	4	5	5	2	5	1	6	4	4	6	2	5	4	6	1	6	1	6	6	3	3	3	5	2	5	5	6	1	6	1	6	6	4	1	6	2	5	1	6	5	4	2	4	1	5	5	5
107	1	6	5	4	5	1	6	1	6	4	4	4	2	5	4	5	1	6	2	5	5	5	5	5	1	6	5	5	5	1	6	1	6	4	5	2	5	2	5	2	5	4	4	2	4	1	5	3	3
108	4	3	3	4	6	5	2	3	4	5	6	3	2	5	6	3	4	3	5	2	3	5	6	3	4	3	4	3	5	4	3	4	3	5	6	1	6	3	4	5	2	3	4	4	2	1	5	3	2
109	2	5	4	5	4	6	1	3	4	4	4	5	2	5	4	3		4	5	2	4	6	4	3	2	5	5	3	4	2	5	2	5	2	4	2	5	3	4	2	5	5	3	2	4	1	5	4	4
110	2	5	1	6	5	2	5	1	6	4	4	6	5	2	6	5	2	5	4	3	5	5	4	4	4	3	4	4	5	2	5	1	6	4	4	2	5	2	5	4	3	4	3	3	3	1	5	4	5
111	2	5	2	5	6	1	6	1	6	4	6	6	1	6	6	6	4	3	3	4	5	6	5	6	1	6	5	5	6	2	5	1	6	6	2	1	6	1	6	1	6
112	3	4	4	4	4	4	3	4	3	5	3	4	3	4	5	4	1	6	5	2	4	4	4	6	6	1	4	4	4	4	3	4	3	4	4	1	6	4	3	2	5	5	4	4	2	4	2	4	4
113	5	2	3	6	5	4	3	3	4	4	3	4	1	6	4	4	3	4	4	3	4	4	5	5	5	2	5	5	5	3	4	1	6	4	5	1	6	4	3	1	6	5	4	2	4	1	5	5	5
114	3	4	6	5	5	5	2	3	4	3	5	3	3	4	3	3	4	3	5	2	3	4	5	3	4	3	5	4	3	5	2	1	6	3	4	2	5	5	2	3	4	2	1	4	2	4	2	3	4
115	5	2	6	4	5	4	3	2	5	5	5	5	2	5	6	4	3	4	5	2	5	4	4	3	4	3	5	4	4	2	5	4	3	5	3	4	3	5	2	4	3	4	4	1	5	1	5	5	4
116	1	6	3	3	1		4	1	6	4	5	4	4	3	5	1	1	6	4	3	3	3	3	3	3	4	4	3	3	3	4	1	6	6	3	1	6	1	6	1	6	4	4	3	3	2	4	3	4
117	1	6	6	6	6	5	2	1	6	6	5	5	1	6	6	5	2	5	2	5	5	6	5	4	2	5	5	5	6	1	6	6	1	5	5	1	6	1	6	2	5	4	4	1	5	1	5	5	5
118	2	5	5	6	4	4	3	1	6	4	5	5	2	5	5	5	2	5	2	5	5	6	4	3	1	6	5	5	5	3	4	1	6	5	4	1	6	2	5	2	5	5	4	1	5	2	4	4	5
119	5	2	3	5	3	5	2	5	2	5	3	4	3	4	3	2	4	3	3	4	3	4	3	2	6	1	3	4	3	5	2	2	5	4	3	5	2	5	2	6	1	3	3	4	2	4	2	2	2
120	1	6	2	6	4	4	3	3	4	5	3	5	1	6	6	3	1	6	6	1	4	4	4	2	1	6	6	4	4	4	3	1	6	5	4	1	6	3	4	3	4	4	4	2	4	1	5	4	4
121	2	5	5	4	3	3	4	2	5	4	3	4	2	5	5	5	2	5	5	2	5	5	3	2	5	2	3	3	3	4	3	2	5	2	3	2	5	4	3	2	5	5	3	2	4	2	4	4	4
122	6	1	4	3	1	6	1	1	6	5	3	3	5	2	4	4	6	1	6	1	3	4	4	2	6	1	3	3	3	5	2	3	4	1	4	1	6	6	1	2	5	2	2	2	4	5	1	3	3
123	5	2	5	5	4	5	2	4	3	5	5	5	4	3	6	3	5	2	5	2	3	6	3	3	4	3	3	2	6	6	1	1	6	3	3	1	6	5	2	1	6	2	2	3	3	2	4	5	5
124	3	4	3	5	3	3	4	2	5	4	3	6	2	5	6	5	3	4	4	3	5	4	4	5	3	4	3	4	5	4	3	2	5	5	4	1	6	3	4	2	5	5	4	1	5	2	4	4	4
125	2	5	5	5	5	3	4	2	5	4	4	5	2	5	5	6	2	5	3	4	5	4	4	4	2	5	5	5	5	3	4	2	5	5	5	2	5	2	5	2	5	5	4	3	3	2	4	4	4
126	2	5	2	3	2	4	3	4	3	2	2	5	4	3	5	3	4	3	6	1	4	5	4	3	3	4	2	4	5	6	1	3	4	5	5	1	6	1	6	1	6	5	4	1	5	1	5	4	3
127	2	5	4	5	4	1	6	2	5	3	5	5	4	3	6	5	3	4	3	4	5	6	5	3	2	5	3	5	5	5	2	1	6	4	5	1	6	1	6	1	6	5	4	1	5	1	5	5	5
128	1	6	6	6	6	1	6	1	6	6	5	6	3	4	6	5	1	6	4	3	6	6	6	6	1	6	6	6	6	3	4	1	6	6	5	1	6	3	4	1	6	5	5	2	4	1	5	5	5
129	3	4	5	3	5	5	2	3	4	5	4	3	2	5	5	2	3	4	5	2	3	5	4	2	3	4	3	3	3	4	3	3	4	3	4	1	6	4	3	2	5	3	2	1	5	5	1	3	3
130	2	5	6	4	3	4	3	2	5	3	3	4	3	4	4	2	3	4	4	3	3	5	4	2	3	4	3	3	3	6	1	4	3	3	3	2	5	2	5	5	2	4	3	3	3	2	4	3	4
131	5	2	4	5	4	6	1	3	4	4	2	6	5	2	5	4	4	3	5	2	4	5	3	2	3	4	3	3	3	6	1	1	6	2	3	3	4	2	5	2	5	4	2	5	1	2	4	4	3
132	4	3	5	5	4	3	4	6	1	3	3	6	4	3	6	4	2	5	4	3	6	4	3	2	3	4	3	3	5	4	3	2	5	5	5	1	6	3	4	1	6	4	3	4	2	2	4	4	5
133	1	6	5	2	5	1	6	2	5	3	5	2	4	3	4	3	3	4	6	1	2	5	4	4	6	1	1	2	1	6	1	4	3	1	3	4	3	6	1	5	2	3	2	5	1	4	2	2	2
134	2	5	6	6	4	2	5	1	6	6	5	5	3	4	6	5	3	4	2	5	6	6	6	5	2	5	5	4	5	4	3	2	5	6	5	1	6	4	3	6	1	4	4	2	4	3	3	5	5
135	5	2	6	4	6	1	6	1	6	4	6	4	4	3	4	3	5	2	2	5	3	5	3	6	1	6	6	6	3	6	1	3	4	4	6	3	4	3	4	5	2	3	4	2	4	2	4	3	5
136	2	5	4	5	4		4	5	2	4	3	4	2	5	5	3	3	4	5	2	5	5	4	5	2	5	4	4	5	5	2	3	4	4	4	1	6	4	3	1	6	4	4	2	4	1	5	4	4
137	2	5	6	6	4	3	4	6	1	5	4	6	2	5	6	4	2	5	5	2	6	5	5	2	2	5	4	4	6	4	3	1	6	4	5	2	5	1	6	1	6	5	5	2	4	1	5	5	5
138	2	5	5	5	4	3	4	1	6	2	4	5	1	6	5	4	2	5	4	3	4	4	4	3	2	5	5	4	4	4	3	2	5	3	5	1	6	1	6	1	6	4	4	2	4	2	4	4	4
139	3	4	4	6	5	3	4	1	6	4	3	6	1	6	4	5	6	1	4	3	3	6	3	1	1	6	4	3	6	4	3	1	6	3	4	1	6	1	6	1	6	5	4	3	3	1	5	4	5
140	3	4	5	4	3	5	2	2	5	4	3	5	2	5	5	4	5	2	5	2	4	4	5	2	3	4	2	2	5	3	4	2	5	3	4	2	5	3	4	3	4		3	1	5	1	5	4	4
141	4	3	4	5	5	2	5	2	5	3	4	6	4	3	4	3	3	4	6	1	3	6	4	5	4	3	3	5	4	2	5	2	5	4	5	2	5	3	4	2	5	3	4	3	3	1	5	4	4
142	2	5	5	6	5	5	2	1	6	5	6	6	1	6	5	5	3	4	2	5	6	6	5	4	3	4	5	5	5	1	6	1	6	5	5	1	6	2	5	1	6	5	5	1	5	1	5	5	5
143	2	5	2	2	4	1	6	2	5	1	2	1	2	5	6	5	2	5	5	2	5	2	5	6	4	3	4	5	6	5	2	4	3	5	4	1	6	1	6	4	3	4	5	1	5	1	5	4	4
144	4	3	3	5	5	5	2	2	5	3	4	5	4	3	4	6	2	5	5	2	5	5	5	4	5	2	5	4	5		4	1	6	5	4	1	6	2	5	2	5	5	4	3	3	1	5	5	5
145	3	4	5	5	5	6	1	5	2	5	4	4	5	2	6	4	3	4	6	1	4	6	6	4	4	3	5	4	4	4	3	3	4	5	5	1	6	4	3	2	5	3	1	3	3	1	5	3	3
146	3	4	2	5	3	3	4	2	5	1	4	5	3	4	5	4	4	3	4	3	5	4	5	4	3	4	4	5	5	4	3	1	6	4	5	2	5	5	2	1	6	4	2	2	4	1	5	4	5
147	4	3	4	4	5	3	4	4	3	3	4	2	3	4	3	2	5	2	4	3	2	3	4	2	5	2	2	4	3	3	4	4	3	2	2	3	4	4	3	4	3	3	2	3	3	1	5	2	3
148	2	5	3	5	3	4	3	3	4	3	3	5	3	4	5	5	3	4	4	3	4	4	4	4	3	4	4	3	3	3	4	2	5	3	3	2	5	2	5	1	6	4	5	3	3	2	4	4	4
149	2	5	4	5	4	5	2	4	3	2	1	6	1	6	4	5	2	5	4	3	5	3	3	2	4	3	3	5	5	1	6	1	6	4	3	1	6	1	6	1	6	4	4	2	4	1	5	4	4
150	1	6	3	5	4	3	4	1	6	5	5	6	2	5	5	5	2	5	2	5	4	5	5	5	2	5	4	4	5	2	5	2	5	1	5	1	6	1	6	1	6	5	5	1	5	2	4	5	5
151	4	3	3	5	5	2	5	1	6	6	5	5	3	4	5	5	6	1	1	6	5	5	4	5	1	6	5	5	6	2	5	1	6	5	3	2	5	5	2	2	5	4	2	2	4	4	2	4	3
152	6	1	4	5	3	1	6	1	6	5	4	4	5	2	4	1	3	4	2	5	2	6	2	5	2	5	6	5	4	6	1	3	4	6	4	2	5	3	4	2	5	3	2	1	5	1	5	3	3
153	1	6	6	6	5	2	5	1	6	4	6	6	2	5	4	5	1	6	2	5	6	6	3	4	1	6	3	6	4	1	6	1	6	4	4	1	6	1	6	3	4	5	5	1	5	1	5	5	5
154	2	5	5	5	6	6	1	4	3	4	3	5	2	5	4	5	3	4	4	3	5	5	5	4	3	4	3	3	4	5	2	2	5	4	4	3	4	4	3	2	5	5	4	2	4	1	5	4	4
155	4	3	5	4	5	6	1		3	3	3	5	4	3	3	3	2	5	3	4	4	5	3	3	5	2	3	3	4	6	1	4	3	2	3	3	4	3	4	2	5	4	4	1	5	1	5	4	3
156	5	2	3	5	4	3	4	5	2	4	4	5	5	2	4	4	4	3	5	2	4	5	4	4	5	2	4	3	4	5	2	5	2	4	4	4	3	4	3	5	2			3	3	2	4	4	5
157	3	4	4	3	2	5	2	4	3	3	3	3	2	5	4	1	2	5	5	2	3	4	4	3	5	2	3	3	3	5	2	2	5	3	4	3	4	4	3	6	1	3	2	2	4	3	3	3	3
158	4	3	4	5	4	6	1	2	5	5	4	4	3	4	5	4	4	3	5	2	4	5	4	2	3	4	3	4	5	6	1	2	5	4	5	1	6	4	3	4	3	4	2	3	3	3	3	4	4
159	3	4	5	4	3	5	2	2	5	4	2	5	5	2	6	3	2	5	4	3	3	4	4	3	2	5	4	2	5	4	3	2	5	3	3	1	6	4	3	2	5	4	3	1	5	1	5	4	3
160	2	5	4	4	5	4	3	4	3	5	5	6	2	5	4	3	1	6	6	1	4	6	4	3	5	2	3	1	4	5	2	4	3	3	4	1	6	4	3	1	6	3	3	3	3	2	4	4	4
161	6	1	3	4	5	3	4	1	6	6	5	4	3	4	6	2	6	1	4	3	4	4	4	3	5	2	5	3	4	5	2	2	5	5	4	1	6	6	1	4	3	4	1	2	4	1	5	3	4
162	2	5	3	5	5	2	5	2	5	4	5	5	2	5	6	5	3	4	4	3	5	4	6	5	2	5	5	5	5	3	4	2	5	6	6	2	5	3	4	2	5	4	4	2	4	1	5	4	4
163	1	6	2	5	3	3	4	1	6	5	5	6	3	4	6	5	2	5	2	5	5	4	4	3	2	5	3	3	4	3	4	1	6	5	4	2	5	2	5	1	6	5	4	1	5	1	5	4	4
164	3	4	4	4	3	1	6	1	6	5	4	4	2	5	3	4	4	3	4	3	4	4	3	4	2	5	3	5	5	4	3	4	3	3	3	5	2	4	3	2	5	4	4	3	3	2	4	4	3
165	5	2	4	4	3	5	2	5	2	5	2	3	4	3	6	2	5	2	4	3	2	5	4	2	3	4	2	3	3	3	4	3	4	2	2	4	3	5	2	3	4		2	3	3	3	3	3	3
166	4	3	4	3	4	4	3	3	4	3	3	3	2	5	5	2	5	2	4	3	3	3	5	4	4	3	3	3	3	3	4	3	4	3	4	1	6	3	4	6	1	2	3	2	4	1	5	4	4
167	4	3	5	3	3	6	1	4	3	4	4	3	5	2	4	3	3	4	5	2	3	3	3	1	3	4	1	2	2	2	5	3	4	1	3	3	4	4	3	5	2	4	2	2	4	2	4	3	3
168	2	5	6	6	5	5	2	6	1	5	3	5	1	6	4	5	4	3	6	1	4	5	5	5	3	4	4	6	4	6	1	2	5	5	5	1	6	1	6	5	2	4	4	4	2	1	5	5	5
169	1	6	5	6	6	3	4	1	6	6	5	6	3	4	6	5	3	4	6	1	5	6	5	3	2	5	4	4	5	3	4	1	6	3	5	1	6	3	4	2	5	4	3	2	4	2	4	4	3
170	2	5	5	6	5	2	5	5	2	6	6	6	2	5	6	4	3	4	5	2	6	5	5	5	1	6	6	5	6	4	3	2	5	5	5	1	6	1	6	1	6	4	2	2	4	1	5	5	5
171	2	5	5	5	4	5	2	3	4	5	5	6	2	5	5	3	3	4	5	2	5	6	5	4	2	5	4	3	4	3	4	2	5	3	4	1	6	5	2	2	5	4	2	1	5	1	5	4	4
172	3	4	4	4	4	3	4	2	5	3	5	4	3	4	4	4	3	4	3	4	4	4	4	4	3	4	4	5	4	2	5	2	5	4	4	3	4	4	3	3	4	3	2	2	4	1	5	4	4
173	5	2	4	4	3	6	1	4	3	4	4	4	6	1	4	4	3	4	2	5	3	5	5	2	4	3	3	3	4	2	5	2	5	2	5	4	3	3	4	5	2	4	2	2	4	3	3	3	3
174	2	5	6	5	5	3	4	1	6	6	3	5	1	6	6	4	2	5	3	4	5	6	6	4	2	5	5	5	5	3	4	1	6	5	4	1	6	3	4	1	6	4	2	3	3	1	5	5	4
175	2	5	4	4	3	3	4	2	5	4	4	5	1	6	4	4	2	5	3	4	4	5	4	5	5	2	4	4	4	5	2	4	3	4	4	2	5	4	3	4	3	4	4	3	3	3	3	4	4
176	2	5	5	4	5	2	5	3	4	3	5	5	2	5	3	3	3	4	4	3	4	5	2	4	1	6	5	2	3	4	3	3	4	2	4	2	5	3	4	1	6	3	3	1	5	2	4	3	4
177	4	3	6	4	4	1	6	3	4	3	5	4	5	2	4	3	4	3	6	1	4	6	5	6	3	4	4	6	6	3	4	1	6	4	6	4	3	4	3	6	1	4	4	2	4	2	4	4	5
178	1	6	6	6	6	4	3	6	1	6	6	6	1	6	6	4	1	6	5	2	4	6	6	5	5	2	6	5	6	4	3	1	6	3	5	1	6	4	3	5	2	5	3	3	3	4	2	5	5
179	2	5	4	5	4	5	2	2	5	4	3	4	2	5	4	4	1	6	6	1	5	4	4	3	4	3	2	1	3	6	1	3	4	4	5	2	5	5	2	2	5	4	2	2	4	3	3	4	4
180	2	5	3	3	4	5	2	3	4	5	4	4	5	2	5	4	2	5	5	2	3	5	4	5	4	3	4	3	5	4	3	3	4	5	4	2	5	3	4	2	5	4	3	2	4	1	5	3	4
[truncated: 58 more columns]
